# Supplementary material
Source: publisher figshare collection journal article supplement (https://sage.figshare.com/ndownloader/files/12404618)
Supplement: Supplementary file 1 [file 12404618]

**Supplementary Material for: The central locus of self-prioritization. Markus Janczyk, Glyn W. Humphreys, Jie Sui**

***Table A1.*** Inferential statistics for the three-way ANOVAs on Experiment 1a RT data

|  | **Task 1** | | | **Task 2** | | |
| --- | --- | --- | --- | --- | --- | --- |
| **Effect (dfs)** | ***F*** | ***p*** | **ηp²** | ***F*** | ***P*** | **ηp²** |
| SOA (1, 23) | 35.38 | < .001 | .61 | 712.58 | < .001 | .97 |
| Shape category (2, 46) | 5.77 | .006 | .20 | 27.02 | < .001 | .54 |
| Match (1, 23) | 16.75 | < .001 | .42 | 49.47 | < .001 | .68 |
| SOA × Shape category (2, 46) | 3.23 | .049 | .12 | 0.23 | .735 (ε = .75) | .01 |
| SOA × Match (1, 23) | 12.54 | .002 | .35 | 11.41 | .003 | .33 |
| Shape category × Match (2, 46) | 2.08 | .136 | .08 | 11.75 | < .001 | .34 |
| SOA × Shape category × Match (2, 46) | 2.73 | .076 | .11 | 2.69 | .079 | .10 |

***Table A2.*** Inferential statistics for the three-way ANOVAs on Experiment 1b RT data

|  | **Task 1** | | | **Task 2** | | |
| --- | --- | --- | --- | --- | --- | --- |
| **Effect (dfs)** | ***F*** | ***p*** | **ηp²** | ***F*** | ***P*** | **ηp²** |
| SOA (1, 23) | 32.58 | < .001 | .59 | 303.00 | < .001 | .93 |
| Shape category (2, 46) | 9.33 | < .001 | .29 | 25.89 | < .001 | .53 |
| Match (1, 23) | 8.70 | .007 | .27 | 72.64 | < .001 | .76 |
| SOA × Shape category (2, 46) | 1.33 | .275 | .05 | 1.14 | .327 | .05 |
| SOA × Match (1, 23) | 6.53 | .018 | .22 | 0.38 | .544 | .02 |
| Shape category × Match (2, 46) | 1.45 | .244 | .06 | 8.45 | < .001 | .27 |
| SOA × Shape category × Match (2, 46) | 2.52 | .092 | .10 | 0.14 | .825 (ε = .80) | .01 |

***Table A3.*** Inferential statistics for the three-way ANOVAs on Experiment 2 RT data

|  | **Task 1** | | | **Task 2** | | |
| --- | --- | --- | --- | --- | --- | --- |
| **Effect (dfs)** | ***F*** | ***p*** | **ηp²** | ***F*** | ***P*** | **ηp²** |
| SOA (1, 23) | 1.55 | .225 | .06 | 668.16 | < .001 | .97 |
| Shape category (2, 46) | 3.89 | .041 | .14 | 33.55 | < .001 | .59 |
| Match (1, 23) | 14.69 | .001 | .39 | 42.73 | < .001 | .65 |
| SOA × Shape category (2, 46) | 1.36 | .266 | .06 | 0.09 | .916 | < .01 |
| SOA × Match (1, 23) | 16.66 | < .001 | .42 | 9.02 | .006 | .28 |
| Shape category × Match (2, 46) | 0.58 | .566 | .02 | 2.15 | .128 | .09 |
| SOA × Shape category × Match (2, 46) | 0.88 | .421 | .04 | 0.51 | .602 | .02 |

***Table A4.*** Inferential statistics for the three-way ANOVAs on Experiment 4 RT data

|  | **Task 1** | | | **Task 2** | | |
| --- | --- | --- | --- | --- | --- | --- |
| **Effect (dfs)** | ***F*** | ***p*** | **ηp²** | ***F*** | ***P*** | **ηp²** |
| SOA (1, 23) | 17.90 | < .001 | .44 | 1338.44 | < .001 | .98 |
| Shape category (2, 46) | 27.90 | < .001 | .55 | 24.17 | < .001 | .51 |
| Match (1, 23) | 79.57 | < .001 | .78 | 72.86 | < .001 | .76 |
| SOA × Shape category (2, 46) | 0.03 | .974 | < .01 | 14.82 | < .001 | .39 |
| SOA × Match (1, 23) | 4.26 | .050 | .16 | 93.93 | < .001 | .80 |
| Shape category × Match (2, 46) | 3.80 | .030 | .14 | 2.33 | .109 | .09 |
| SOA × Shape category × Match (2, 46) | 0.38 | .686 | .02 | 0.51 | .603 | .02 |
